# Supplementary material for: Developmental dynamics of two bipotent thymic epithelial progenitor types
Source: PubMed Central journal article supplement (PMC9159946; doi:10.1038/s41586-022-04752-8), 2022-05-25
Supplement: 41586_2022_4752_MOESM1_ESM.pdf [file 41586_2022_4752_MOESM1_ESM.pdf]

---

**Supplementary information**

---

**Developmental dynamics of two bipotent thymic epithelial progenitor types**

---

In the format provided by the authors and unedited

**Supplementary Table 1** | Gene set list for early progenitor.

|          |          |          |       |
|----------|----------|----------|-------|
| Ackr4    | Fstl1    | Ogn      | Wscd1 |
| Adamts10 | Gas1     | Pak3     | Xdh   |
| Agrn     | Gbp2     | Palld    | Zfp36 |
| Aldh2    | Gnaq     | Pdpm     |       |
| Aldh6a1  | Gpm6b    | Penk     |       |
| Amotl1   | Gprasp1  | Plxdc2   |       |
| Amotl2   | Gstm2    | Pmp22    |       |
| Antxr1   | H2-DMA   | Prelp    |       |
| Apoe     | Hes6     | Prrg3    |       |
| Ar       | Hic1     | Prss23   |       |
| Bcam     | Hsd17b10 | Ptprz1   |       |
| Bcl11a   | Igfbp2   | Ptrf     |       |
| Bcl2     | Igfbp3   | Pygb     |       |
| Bmp4     | Igfbp5   | Rbp1     |       |
| Btg2     | Igfbp7   | Rnase4   |       |
| Cbx6     | Iigp1    | Scn1a    |       |
| Ccdc80   | Il33     | Serpinf1 |       |
| Cdh11    | Irgm1    | Serpinh1 |       |
| Cldn8    | Isl1     | Shisa2   |       |
| Clec11a  | Itm2c    | Slc2a13  |       |
| Clstn1   | Kazald1  | Sord     |       |
| Col18a1  | Lamb1    | Sparc    |       |
| Cpne8    | Laptm4a  | Spon2    |       |
| Cthrc1   | Limch1   | Spry1    |       |
| Cyp1b1   | Ltbp3    | Tcn2     |       |
| Dcn      | Maged1   | Tgfbr2   |       |
| Ddr1     | Megf6    | Tgfbr3   |       |
| Dhrs3    | Meis1    | Thbd     |       |
| Dlk2     | Mgll     | Thbs1    |       |
| Dnajc13  | Mgp      | Timp2    |       |
| Dpp6     | Myl9     | Tinagl1  |       |
| Dpysl2   | Mylk     | Tnfrsf19 |       |
| Dsc3     | Nb11     | Tns1     |       |
| Egr1     | Nell2    | Tns3     |       |
| Eid1     | Nfia     | Trim29   |       |
| Fam129a  | Nfib     | Trp63    |       |
| Fam19a5  | Nfix     | Tspan9   |       |
| Fkbp9    | Nr2f1    | Twsg1    |       |
| Fmod     | Nr4a1    | Txnip    |       |
| Fos      | Nrtn     | Unc119   |       |
| Fosb     | Ntrk3    | Vmac     |       |
| Frmd6    | Oat      | Wls      |       |

**Supplementary Table 2** | Gene set list for postnatal progenitor.

|          |         |
|----------|---------|
| Acta2    | Myl9    |
| Apoe     | Nrbp2   |
| Ascl1    | S1pr3   |
| Boc      | Slc4a11 |
| C1s1     | Sox4    |
| C3       | Stat2   |
| Cald1    | Sult5a1 |
| Ccl11    | Tagln   |
| Ccl21a   | Tgfbi   |
| Clca3a1  | Tpm2    |
| Col6a1   | Wfikkn2 |
| Col6a2   |         |
| Cyr61    |         |
| Ddx60    |         |
| Dpysl3   |         |
| Dst      |         |
| Emp2     |         |
| Fam101b  |         |
| Flna     |         |
| Fst      |         |
| Fzd2     |         |
| Gas1     |         |
| Glul     |         |
| Gpx3     |         |
| Gsn      |         |
| Hpgd     |         |
| Htra1    |         |
| Id1      |         |
| Ifi2712a |         |
| Igfbp4   |         |
| Igfbp5   |         |
| Irf7     |         |
| Isg15    |         |
| Itga6    |         |
| Itgb4    |         |
| Krt14    |         |
| Krt5     |         |
| Krt7     |         |
| Lamb3    |         |
| Lars2    |         |
| Lifr     |         |
| Mgp      |         |

**Supplementary Table 3** | Gene set list for cTECs.

|           |           |         |           |         |
|-----------|-----------|---------|-----------|---------|
| Abat      | Cxcl12    | Ier3    | Pepd      | Snhg11  |
| Adhfe1    | Cxx1a     | Ifi27   | Pfn2      | Snx3    |
| Agpat3    | Cyp26b1   | Impact  | Pithd1    | Spock2  |
| AI314180  | Dact2     | Inmt    | Pla2g16   | Spryd7  |
| AI413582  | Dcxr      | Irf1    | Plekhb1   | Srebf1  |
| Akap12    | Diras2    | Isg20   | Plgrkt    | St3gal6 |
| Akap2     | Dll4      | Itgb2   | Pltp      | Stard5  |
| Alcam     | Dock8     | Kcnk2   | Ppp1r27   | Syngn1  |
| Aldh111   | Dsp       | Kitl    | Prdx5     | Synm    |
| Aldh4a1   | Dst       | Krt18   | Prr32     | Tbata   |
| Ank3      | Dtx4      | Krt8    | Prss16    | Tbc1d2b |
| Arhgef10l | Dusp28    | Lamp2   | Psat1     | Tcf7    |
| Bag3      | Dynll2    | Lancl1  | Psma1     | Thy1    |
| Bahd1     | Dynlt3    | Lat     | Psma5     | Trbc1   |
| Bicd2     | Endou     | Lck     | Psma7     | Trpm2   |
| Bnip3l    | Enpep     | Lpcat2  | Psemb10   | Tsc22d1 |
| Bok       | Etnk1     | Lpl     | Psemb11   | Tulp3   |
| Btbd11    | Exoc7     | Ly75    | Psemb4    | Ufsp1   |
| Calcoco1  | Fabp5     | Man2a1  | Psemb9    | Vat1    |
| Cbr2      | Fam213b   | Mast4   | Psmc2     | Wnt4    |
| Ccdc34    | Fam49b    | Mfsd12  | Pttg1ip   | Zfyve21 |
| Ccl25     | Fasn      | Mgat3   | Rab11fip4 |         |
| Ccr9      | Fgf14     | Mmp2    | Rag1      |         |
| Cd4       | Fmo1      | Mreg    | Rassf2    |         |
| Cd83      | Foxn1     | Mrpl3   | Rassf5    |         |
| Cd8a      | Foxo3     | Mtss1l  | Rbms3     |         |
| Cd8b1     | Fth1      | Myo5c   | Rgcc      |         |
| Cdh4      | Fxyd2     | Nav2    | Rnpepl1   |         |
| Cdk20     | Gabarapl1 | Ndr3    | S100a1    |         |
| Cdr2l     | Gas6      | Ndufa11 | S100a10   |         |
| Cds1      | Gatsl3    | Nefm    | Satb1     |         |
| Cisd3     | Gch1      | Neurl2  | Scarf2    |         |
| Clic5     | Ggh       | Nin     | Scd2      |         |
| Clip4     | Got1      | Nqo1    | Scnn1a    |         |
| Cnn3      | Gtf2e2    | Nsmaf   | Setd7     |         |
| Copz2     | Hadhb     | Nxn     | Sfxn1     |         |
| Cpt1a     | Hdac7     | Ociad2  | Sgpl1     |         |
| Creb3l2   | Hexb      | Oma1    | Slc22a7   |         |
| Crip3     | Hey1      | P4ha3   | Slc25a4   |         |
| Cstb      | Hgsnat    | Pax1    | Slc36a1   |         |
| Cth       | Hist1h2bc | Pds5b   | Slc46a2   |         |
| Ctsl      | Hpgd      | Pdxk    | Snap91    |         |

**Supplementary Table 4** | Gene set list for mTECs.

|          |               |        |           |          |           |           |
|----------|---------------|--------|-----------|----------|-----------|-----------|
| AA467197 | Ccl6          | Ehd1   | Igfbp6    | Mxd1     | Rap1gap   | Sprr1a    |
| Adap1    | Ccl9          | Elf3   | Igsf8     | Myl7     | Rarres1   | Srgn      |
| Adgb     | Ccr7          | Eno2   | Il12a     | Myo15b   | Rasd1     | Sspo      |
| Aebp2    | Cd52          | Ero1lb | Il13      | N4bp2l1  | Reg3g     | Sst       |
| Ahcyl2   | Cd70          | Espn   | Il1rn     | Ncf1     | Resp18    | Syt1      |
| Aif1l    | Cdh17         | Etv3   | Il23a     | Ncf4     | Rnasel    | Syt7      |
| Aire     | Cdhr5         | Fabp4  | Il2rg     | Neat1    | Rnf128    | Tac2      |
| Alas1    | Cdkn1a        | Fabp6  | Ing1      | Nfkbia   | Rogdi     | Tbc1d4    |
| Ank      | Cdkn1c        | Fabp9  | Inpp5b    | Nos2     | Rptn      | Tfap2b    |
| Ankrd33b | Cdkn2b        | Fam25c | Insm1     | Nostrin  | S100a14   | Tff3      |
| Anxa10   | Cdx1          | Fam89a | Itgb8     | Nptx2    | S100a4    | Tjp3      |
| Aoc1     | Chil1         | Fcer1g | Kcnk6     | Nsmce1   | S100a8    | Tkt       |
| Apoa1    | Ckmt1         | Fezf2  | Kctd12    | Nsmce2   | S100a9    | Tm4sf5    |
| Apoa4    | Cldn13        | Fgf21  | Klk1      | Nts      | S100g     | Tmcc3     |
| Apobec1  | Cldn3         | Fhad1  | Klk1b11   | Nup85    | Saa3      | Tmem19    |
| Apoc2    | Cldn4         | Fnbp1  | Klk7      | Oasl1    | Sat1      | Tnf       |
| Aqp3     | Cldn7         | Fscn1  | Krt10     | Ogfrl1   | Sel1l3    | Tnfrsf11b |
| Arc      | Cnp           | Gas7   | Krt16     | Oit1     | Selm      | Tnfrsf8   |
| Asprv1   | Cpeb4         | Gbp4   | Krt20     | Ooep     | Sema4a    | Tnfsf9    |
| Atp1a2   | Crabp1        | Gda    | Krt77     | Pcp4     | Sephs2    | Tnip1     |
| Atp1b1   | Crhbp         | Gdf15  | Krt79     | Pgc      | Serpinb12 | Tnip3     |
| Atp6v1c1 | Csn2          | Gjb2   | Lad1      | Pglyrp1  | Serpinb1a | Tnmd      |
| AU040320 | Cst6          | Gnat3  | Laptm5    | Pglyrp2  | Serpinb2  | Tnnt2     |
| Avil     | Ctrb1         | Gnb3   | Lcp1      | Pigr     | Serpinb9  | Traf1     |
| AW112010 | Ctsh          | Gnb4   | Liph      | Pip5k1b  | Sgpp1     | Trpm5     |
| BC051142 | Ctss          | Gng13  | Lrmp      | Pla1a    | Sh2d6     | Ttn       |
| Bcl2a1a  | Ctsz          | Gpa33  | Lrrc42    | Pla2g4a  | Sh3tc2    | Ubd       |
| Bcl2l1   | Cxcl2         | Gramd4 | Lsp1      | Plagl1   | Sirt1     | Ucma      |
| Blnk     | Cyba          | Grap   | Ly6i      | Plb1     | Skint2    | Unc93a    |
| Bmp2k    | Cybb          | Grin2c | Lypd2     | Pld1     | Skint4    | Utf1      |
| Cadps    | Cyp2a4        | Gstm1  | Lypd8     | Plekha4  | Skint9    | Vdr       |
| Calca    | Cyp2a4 Cyp2a5 | Gstt1  | Lyz1      | Pmaip1   | Slc13a2   | Vmo1      |
| Calcb    | Cystm1        | Guca2b | Lyz1 Lyz2 | Prap1    | Slc43a3   | Wfdc21    |
| Casp1    | Defb6         | H2-Eb2 | Malat1    | Prg2     | Slc4a8    |           |
| Casz1    | Dgat2         | H2-Oa  | Marc1     | Prg4     | Slc5a8    |           |
| Ccdc184  | Dio1          | Hagh   | Mctp1     | Prokr2   | Slc6a20a  |           |
| Ccdc88a  | Dmkn          | Hal    | Mdm2      | Psors1c2 | Slco5a1   |           |
| Ccl17    | Dmpk          | Hamp   | Me1       | Ptgds    | Smtnl1    |           |
| Ccl20    | Dnase1l3      | Hdc    | Mep1a     | Ptgs2    | Sncg      |           |
| Ccl22    | Dscaml1       | Hopx   | Mmp7      | Pyy      | Spink1    |           |
| Ccl27a   | Eaf2          | Icosl  | Muc1      | Rab25    | Spink5    |           |
| Ccl5     | Ebi3          | Igf1   | Muc13     | Rac2     | Spock3    |           |

**Supplementary Table 5** | Genes included in the cell cycle gene set.

Cenpf  
Arl6ip1  
Ccnb1  
Tuba1c  
Smc2  
H2afx  
Tubb5  
Cenpa  
Ccnb2  
Ube2c  
Nucks1  
Dut  
Hmgn2  
Hmgb1  
Mki67  
Ccna2  
Tmpo  
Cks2  
Tubb4b  
Tuba1a  
Hmgb2  
Cenpe  
Hist1h2ab  
Ube2s  
Ncapd2  
H2afz  
Dek  
Ranbp1  
Ran  
Stmn1  
Hnrnpa2b1  
Ybx1  
Pcna  
Ptma  
Rrm2  
Ppia  
Pcna-ps2  
Hnrnpa3  
Mcm6  
Atp5g3  
Txn1

**Supplementary Table 6** | Genes driving the enrichment for GO categories.

**Biological process**

**regulation of cell growth - 1**

|         |                            |
|---------|----------------------------|
| Kazald1 | early progenitor genes     |
| Clstn1  | early progenitor genes     |
| Ddr1    | early progenitor genes     |
| Igfbp2  | early progenitor genes     |
| Igfbp3  | early progenitor genes     |
| Igfbp5  | early progenitor genes     |
| Igfbp7  | early progenitor genes     |
| Htra1   | postnatal progenitor genes |
| Cyr61   | postnatal progenitor genes |
| Igfbp4  | postnatal progenitor genes |
| Igfbp5  | postnatal progenitor genes |

**response to mechanical stimulus - 2**

Btg2  
Fosb  
Dcn  
Igfbp2  
Txnip  
Thbs1  
Tgfbr2

**negative regulation of cell proliferation - 3**

Bcl2  
Btg2  
Ar  
Bmp4  
Cyp1b1  
Ddr1  
Igfbp3  
Nfib  
Pmp22  
Ptprz1  
Spry1  
Timp2  
Tgfbr2

**cell adhesion - 4**

Boc  
Col6a1  
Col6a2  
Cyr61

Dst  
Emp2  
Itga6  
Itgb4  
Lamb3  
Tgfb1

**positive regulation of epithelial cell proliferation - 5**

Htra1  
Glul  
Gas1  
Id1

**antigen processing and presentation of exogenous peptide antigen via MHC class I,  
TAP- dependent - 6**

Psm1  
Psm5  
Psm7  
Psm10  
Psm4  
Psm9  
Psm11

**proteolysis involved in cellular protein catabolic process - 7**

Ctsl  
Psm1  
Psm5  
Psm7  
Psm10  
Psm4  
Psm9  
Psm11

**lipid metabolic process - 8**

Agpat3  
Cds1  
Oma1  
Cpt1a  
Etnk1  
Fam213b  
Fabp5  
Fasn  
Hadhb  
Hpgd  
Lpl  
Lpcat2  
Pla2g16  
Pltp



Sgpl1  
Scd2  
Srebf1

**immune response - 9**

Oasl1  
Blnk  
Cd70  
Sh2d6  
Ctss  
Ccl17  
Ccl20  
Ccl22  
Ccl27a  
Ccl5  
Ccl6  
Ccl9  
Ccr7  
Cxcl2  
H2-Oa  
H2-Eb2  
Il12a  
Il13  
Il23a  
Prg2  
Prg4  
Serpib9  
Tnfsf9  
Tnfrsf11b  
Tnfrsf8  
Tnf

**inflammatory response - 10**

Elf3  
S100a8  
S100a9  
Tnip1  
Calca  
Ccl17  
Ccl20  
Ccl22  
Ccl5  
Ccl6  
Ccl9  
Ccr7  
Cxcl2  
Chil1  
Crhbp

Cyba  
Cybb  
Il13  
Il23a  
Krt16  
Ncf1  
Nos2  
Ptgs2  
Reg3g  
Tnfrsf11b  
Tnfrsf8  
Tnf

**chemotaxis - 11**

Rac2  
S100a8  
S100a9  
Ccl17  
Ccl20  
Ccl22  
Ccl5  
Ccl6  
Ccl9  
Ccr7  
Cxcl2  
Lsp1  
Nup85

**Supplementary Table 7** | Barcode IDs and cell numbers in different TEC compartments of E16.5 thymic epithelium.

|                  |       |    |    |    |     |      |
|------------------|-------|----|----|----|-----|------|
| barcode ID_E16.5 | 1     | 10 | 11 | 17 | 2   | 2_24 |
| cT               | 272   | 7  | 3  | 9  | 75  | 1    |
| mT               | 0     | 0  | 0  | 0  | 0   | 0    |
| pp               | 32    | 0  | 1  | 1  | 15  | 0    |
| ep               | 146   | 4  | 6  | 2  | 44  | 0    |
| barcode ID_E16.5 | 20    | 22 | 23 | 3  | 3_4 | 32   |
| cT               | 3     | 2  | 1  | 12 | 1   | 1    |
| mT               | 0     | 0  | 0  | 0  | 0   | 0    |
| pp               | 1     | 0  | 0  | 0  | 0   | 0    |
| ep               | 6     | 0  | 1  | 1  | 1   | 1    |
| barcode ID_E16.5 | 35    | 4  | 46 | 5  | 58  | 59   |
| cT               | 5     | 13 | 2  | 50 | 1   | 15   |
| mT               | 0     | 0  | 0  | 0  | 0   | 0    |
| pp               | 1     | 3  | 1  | 7  | 0   | 1    |
| ep               | 2     | 13 | 1  | 33 | 1   | 6    |
| barcode ID_E16.5 | 59_60 | 6  | 62 | 63 | 64  | 65   |
| cT               | 2     | 13 | 0  | 5  | 4   | 0    |
| mT               | 0     | 0  | 0  | 0  | 0   | 0    |
| pp               | 0     | 2  | 0  | 2  | 1   | 1    |
| ep               | 1     | 10 | 1  | 7  | 4   | 0    |
| barcode ID_E16.5 | 66_46 | 67 | 7  | 8  | 9   | 0    |
| cT               | 4     | 6  | 8  | 0  | 5   | 53   |
| mT               | 0     | 0  | 0  | 0  | 0   | 0    |
| pp               | 0     | 0  | 3  | 0  | 1   | 9    |
| ep               | 1     | 1  | 3  | 1  | 6   | 30   |

**Supplementary Table 8** | Barcode IDs and cell numbers in different TEC compartments of P0 thymic epithelium.

|               |     |    |    |    |    |     |
|---------------|-----|----|----|----|----|-----|
| barcode ID_P0 | 1   | 18 | 2  | 3  | 32 | 33  |
| cT            | 313 | 11 | 9  | 0  | 12 | 1   |
| mT            | 62  | 0  | 7  | 1  | 0  | 0   |
| pp            | 28  | 0  | 7  | 1  | 0  | 0   |
| ep            | 82  | 4  | 2  | 0  | 1  | 0   |
| barcode ID_P0 | 34  | 35 | 4  | 41 | 5  | 53  |
| cT            | 1   | 0  | 15 | 0  | 10 | 10  |
| mT            | 0   | 1  | 2  | 0  | 20 | 0   |
| pp            | 0   | 0  | 1  | 0  | 5  | 0   |
| ep            | 0   | 0  | 2  | 0  | 4  | 2   |
| barcode ID_P0 | 54  | 56 | 57 | 58 | 8  | 0   |
| cT            | 7   | 0  | 0  | 1  | 13 | 242 |
| mT            | 0   | 6  | 0  | 0  | 3  | 66  |
| pp            | 1   | 3  | 0  | 0  | 0  | 32  |
| ep            | 4   | 0  | 1  | 0  | 6  | 53  |

**Supplementary Table 9** | Barcode IDs and cell numbers in different TEC compartments of P28 male thymic epithelium.

|                     |     |      |      |      |      |
|---------------------|-----|------|------|------|------|
| barcode ID_P28 male | 1   | 100  | 101  | 102  | 105  |
| cT                  | 26  | 0    | 0    | 0    | 0    |
| mT                  | 174 | 1    | 0    | 1    | 0    |
| pp                  | 22  | 0    | 0    | 0    | 0    |
| ep                  | 237 | 0    | 1    | 0    | 1    |
| barcode ID_P28 male | 106 | 107  | 2    | 2_4  | 21   |
| cT                  | 0   | 0    | 9    | 0    | 0    |
| mT                  | 0   | 0    | 50   | 2    | 7    |
| pp                  | 0   | 0    | 9    | 0    | 1    |
| ep                  | 1   | 1    | 78   | 0    | 3    |
| barcode ID_P28 male | 28  | 3    | 34_2 | 4    | 41   |
| cT                  | 0   | 1    | 0    | 0    | 0    |
| mT                  | 3   | 3    | 4    | 7    | 0    |
| pp                  | 1   | 2    | 0    | 1    | 0    |
| ep                  | 4   | 3    | 4    | 14   | 1    |
| barcode ID_P28 male | 42  | 5    | 5_2  | 58   | 59   |
| cT                  | 0   | 7    | 1    | 0    | 0    |
| mT                  | 0   | 59   | 2    | 0    | 0    |
| pp                  | 0   | 6    | 0    | 0    | 0    |
| ep                  | 1   | 54   | 7    | 1    | 1    |
| barcode ID_P28 male | 6   | 68   | 68_2 | 68_5 | 7    |
| cT                  | 0   | 0    | 1    | 0    | 0    |
| mT                  | 3   | 0    | 7    | 5    | 3    |
| pp                  | 0   | 0    | 0    | 0    | 0    |
| ep                  | 4   | 2    | 2    | 3    | 5    |
| barcode ID_P28 male | 8   | 83   | 84   | 85   | 86   |
| cT                  | 0   | 0    | 0    | 1    | 0    |
| mT                  | 6   | 5    | 2    | 3    | 4    |
| pp                  | 2   | 0    | 1    | 0    | 0    |
| ep                  | 5   | 6    | 1    | 4    | 3    |
| barcode ID_P28 male | 87  | 88   | 89   | 90   | 90_5 |
| cT                  | 0   | 0    | 1    | 0    | 0    |
| mT                  | 2   | 4    | 1    | 2    | 0    |
| pp                  | 0   | 0    | 0    | 0    | 0    |
| ep                  | 4   | 3    | 6    | 3    | 1    |
| barcode ID_P28 male | 91  | 91_5 | 92   | 93   | 94_2 |
| cT                  | 0   | 1    | 0    | 0    | 1    |
| mT                  | 1   | 2    | 0    | 1    | 2    |

|                     |    |      |    |      |      |
|---------------------|----|------|----|------|------|
| pp                  | 0  | 0    | 0  | 0    | 0    |
| ep                  | 0  | 2    | 1  | 0    | 6    |
| barcode ID_P28 male | 95 | 95_7 | 96 | 96_8 | 97_5 |
| cT                  | 0  | 0    | 0  | 0    | 0    |
| mT                  | 0  | 6    | 5  | 0    | 0    |
| pp                  | 0  | 0    | 1  | 0    | 0    |
| ep                  | 1  | 3    | 1  | 2    | 1    |
| barcode ID_P28 male | 0  |      |    |      |      |
| cT                  | 28 |      |    |      |      |
| mT                  | 82 |      |    |      |      |
| pp                  | 5  |      |    |      |      |
| ep                  | 78 |      |    |      |      |

**Supplementary Table 10** | Barcode IDs and cell numbers in different TEC compartments of P28\_female\_1 thymic epithelium.

|                         |      |     |     |    |      |
|-------------------------|------|-----|-----|----|------|
| barcode ID_P28 female 1 | 1    | 109 | 110 | 13 | 14   |
| cT                      | 15   | 0   | 1   | 1  | 0    |
| mT                      | 40   | 2   | 1   | 3  | 3    |
| pp                      | 8    | 1   | 1   | 1  | 0    |
| ep                      | 53   | 2   | 3   | 4  | 6    |
| barcode ID_P28 female 1 | 16   | 19  | 2   | 21 | 25   |
| cT                      | 7    | 0   | 11  | 0  | 0    |
| mT                      | 0    | 4   | 13  | 1  | 1    |
| pp                      | 0    | 0   | 4   | 0  | 0    |
| ep                      | 0    | 2   | 12  | 1  | 0    |
| barcode ID_P28 female 1 | 26   | 27  | 28  | 29 | 3_12 |
| cT                      | 0    | 0   | 0   | 1  | 0    |
| mT                      | 1    | 0   | 0   | 0  | 3    |
| pp                      | 0    | 0   | 0   | 0  | 0    |
| ep                      | 0    | 1   | 1   | 0  | 5    |
| barcode ID_P28 female 1 | 4    | 41  | 5   | 7  | 0    |
| cT                      | 0    | 0   | 2   | 1  | 35   |
| mT                      | 0    | 1   | 7   | 1  | 9    |
| pp                      | 0    | 0   | 0   | 0  | 3    |
| ep                      | 1    | 0   | 8   | 1  | 11   |
| barcode ID_P28 female 1 | 3_15 | 30  | 31  |    |      |
| cT                      | 1    | 1   | 1   |    |      |
| mT                      | 3    | 0   | 0   |    |      |
| pp                      | 0    | 0   | 0   |    |      |
| ep                      | 2    | 0   | 0   |    |      |

**Supplementary Table 11** | Barcode IDs and cell numbers in different TEC compartments of P28\_female\_2 thymic epithelium.

|                         |     |    |     |    |    |
|-------------------------|-----|----|-----|----|----|
| barcode ID_P28 female 2 | 1   | 2  | 4   | 41 | 42 |
| cT                      | 52  | 0  | 0   | 0  | 2  |
| mT                      | 111 | 11 | 9   | 9  | 2  |
| pp                      | 20  | 1  | 1   | 1  | 0  |
| ep                      | 64  | 5  | 3   | 7  | 4  |
| barcode ID_P28 female 2 | 43  | 44 | 45  | 48 | 5  |
| cT                      | 1   | 0  | 1   | 0  | 1  |
| mT                      | 4   | 4  | 2   | 0  | 6  |
| pp                      | 1   | 0  | 0   | 0  | 1  |
| ep                      | 2   | 2  | 2   | 1  | 2  |
| barcode ID_P28 female 2 | 51  | 8  | 0   |    |    |
| cT                      | 0   | 1  | 48  |    |    |
| mT                      | 0   | 7  | 135 |    |    |
| pp                      | 0   | 0  | 18  |    |    |
| ep                      | 1   | 5  | 86  |    |    |



**Supplementary Table 12** | Barcode IDs and cell numbers in different TEC compartments of 1 yr thymic epithelium.

|               |    |    |    |    |    |    |
|---------------|----|----|----|----|----|----|
| barcode ID_1y | 1  | 15 | 2  | 29 | 41 | 44 |
| cT            | 19 | 1  | 9  | 4  | 0  | 1  |
| mT            | 18 | 1  | 4  | 0  | 2  | 0  |
| pp            | 80 | 1  | 22 | 8  | 15 | 1  |
| ep            | 0  | 0  | 0  | 0  | 0  | 0  |
| barcode ID_1y | 5  | 68 | 69 | 70 | 71 |    |
| cT            | 21 | 4  | 0  | 0  | 0  |    |
| mT            | 28 | 0  | 0  | 0  | 0  |    |
| pp            | 93 | 4  | 1  | 1  | 1  |    |
| ep            | 0  | 0  | 0  | 0  | 0  |    |
| barcode ID_1y | 73 | 74 | 0  |    |    |    |
| cT            | 1  | 7  | 13 |    |    |    |
| mT            | 0  | 0  | 11 |    |    |    |
| pp            | 2  | 3  | 41 |    |    |    |
| ep            | 0  | 0  | 0  |    |    |    |

**Supplementary Table 13** | Barcode IDs and cell numbers in different TEC compartments of P28\_Fgf7\_tg thymic epithelium.

|                        |       |    |    |    |      |
|------------------------|-------|----|----|----|------|
| barcode ID_Fgf7 tg P28 | 1     | 15 | 2  | 21 | 3    |
| cT                     | 308   | 1  | 1  | 2  | 4    |
| mT                     | 98    | 0  | 2  | 1  | 1    |
| pp                     | 482   | 0  | 10 | 4  | 1    |
| ep                     | 270   | 0  | 4  | 4  | 4    |
| barcode ID_Fgf7 tg P28 | 4     | 43 | 45 | 5  | 5_74 |
| cT                     | 7     | 6  | 0  | 11 | 6    |
| mT                     | 3     | 1  | 0  | 1  | 0    |
| pp                     | 11    | 2  | 0  | 13 | 3    |
| ep                     | 2     | 3  | 1  | 12 | 1    |
| barcode ID_Fgf7 tg P28 | 59    | 76 | 78 | 8  | 8_81 |
| cT                     | 0     | 5  | 5  | 4  | 2    |
| mT                     | 0     | 1  | 0  | 0  | 1    |
| pp                     | 1     | 8  | 5  | 12 | 2    |
| ep                     | 0     | 3  | 1  | 6  | 2    |
| barcode ID_Fgf7 tg P28 | 80_45 | 81 | 0  |    |      |
| cT                     | 3     | 0  | 21 |    |      |
| mT                     | 1     | 0  | 5  |    |      |
| pp                     | 2     | 1  | 19 |    |      |
| ep                     | 1     | 0  | 13 |    |      |

**Supplementary Table 14** | Barcode IDs and cell numbers in different TEC compartments of 1 yr\_Fgf7\_tg thymic epithelium.

|                       |       |        |       |       |        |
|-----------------------|-------|--------|-------|-------|--------|
| barcode ID_Fgf7 tg 1y | 1     | 111    | 112   | 112_2 | 112_4  |
| cT                    | 2     | 1      | 0     | 0     | 0      |
| mT                    | 9     | 1      | 1     | 0     | 0      |
| pp                    | 121   | 24     | 20    | 3     | 1      |
| ep                    | 0     | 0      | 0     | 0     | 0      |
| barcode ID_Fgf7 tg 1y | 113   | 114    | 115   | 116   | 117    |
| cT                    | 1     | 0      | 0     | 2     | 0      |
| mT                    | 1     | 1      | 1     | 0     | 1      |
| pp                    | 8     | 7      | 4     | 9     | 5      |
| ep                    | 0     | 0      | 0     | 0     | 0      |
| barcode ID_Fgf7 tg 1y | 118   | 118_2  | 119   | 119_4 | 120    |
| cT                    | 0     | 0      | 0     | 0     | 1      |
| mT                    | 0     | 0      | 0     | 0     | 1      |
| pp                    | 8     | 1      | 10    | 1     | 8      |
| ep                    | 0     | 0      | 0     | 0     | 0      |
| barcode ID_Fgf7 tg 1y | 121   | 122    | 122_2 | 123   | 124    |
| cT                    | 0     | 0      | 0     | 0     | 0      |
| mT                    | 3     | 0      | 0     | 0     | 0      |
| pp                    | 10    | 2      | 1     | 2     | 1      |
| ep                    | 0     | 0      | 0     | 0     | 0      |
| barcode ID_Fgf7 tg 1y | 125_2 | 126_36 | 130   | 131   | 2      |
| cT                    | 0     | 0      | 0     | 0     | 1      |
| mT                    | 0     | 0      | 0     | 0     | 10     |
| pp                    | 1     | 1      | 1     | 1     | 140    |
| ep                    | 0     | 0      | 0     | 0     | 0      |
| barcode ID_Fgf7 tg 1y | 2_111 | 2_129  | 2_4   | 2_8   | 28     |
| cT                    | 0     | 0      | 0     | 0     | 0      |
| mT                    | 0     | 0      | 1     | 0     | 0      |
| pp                    | 3     | 1      | 1     | 1     | 6      |
| ep                    | 0     | 0      | 0     | 0     | 0      |
| barcode ID_Fgf7 tg 1y | 28_36 | 3      | 35    | 36    | 36_111 |
| cT                    | 0     | 0      | 0     | 1     | 0      |
| mT                    | 1     | 0      | 0     | 3     | 3      |
| pp                    | 4     | 1      | 1     | 49    | 21     |
| ep                    | 0     | 0      | 0     | 0     | 0      |
| barcode ID_Fgf7 tg 1y | 36_2  | 36_46  | 36_8  | 4     | 46     |
| cT                    | 0     | 0      | 0     | 0     | 0      |
| mT                    | 0     | 0      | 0     | 4     | 0      |

|                           |    |      |      |     |     |
|---------------------------|----|------|------|-----|-----|
| pp                        | 1  | 3    | 1    | 24  | 1   |
| ep                        | 0  | 0    | 0    | 0   | 0   |
| barcode ID_Fgf7 tg 1y     | 5  | 5_2  | 5_36 | 5_4 | 5_7 |
| cT                        | 1  | 0    | 0    | 0   | 0   |
| mT                        | 3  | 1    | 0    | 0   | 0   |
| pp                        | 35 | 4    | 8    | 3   | 11  |
| ep                        | 0  | 0    | 0    | 0   | 0   |
| barcode ID_Fgf7 tg 1y 5_8 |    | 59   | 59_2 | 65  | 7   |
| cT                        | 0  | 1    | 0    | 0   | 2   |
| mT                        | 0  | 2    | 0    | 0   | 1   |
| pp                        | 1  | 26   | 1    | 8   | 23  |
| ep                        | 0  | 0    | 0    | 0   | 0   |
| barcode ID_Fgf7 tg 1y 7_2 |    | 7_36 | 76   | 8   | 0   |
| cT                        | 0  | 0    | 0    | 0   | 2   |
| mT                        | 0  | 0    | 0    | 3   | 5   |
| pp                        | 2  | 1    | 9    | 13  | 84  |
| ep                        | 0  | 0    | 0    | 0   | 0   |

**Supplementary Table 15** | Genotyping information.

| <b>Transgene</b>                | <b>Forward primer 5'-3'</b> | <b>Reverse primer 5'-3'</b> | <b>Amplicon size (bp)</b>                        |
|---------------------------------|-----------------------------|-----------------------------|--------------------------------------------------|
| <i>Foxn1:Fgf7</i>               | CCGTGGCAGTTGGAATTGTGGC      | ACATTCCCCTCCGCTGTGTGTC      | 186                                              |
| <i>Foxn1:Fgfr2b</i>             | CTGGCTCACTGTCCTGCCCAA       | AGCATCGGGGTGTCCGCTGT        | 324                                              |
| <i>hU6:sgRNA<sup>Hprt</sup></i> | GGACTATCATATGCTTACCG        | CGACTCGGTGCCACTTTTTTC       | 171                                              |
| <i>Foxn1:eGFP</i>               | Xah163                      | L1_EGFP                     | 325                                              |
| <i>Foxn1:Cre</i>                | TGCATGATCTCCGGTATTGA        | CGTACTGACGGTGGGAGAAT        | 374                                              |
| <i>Rosa26LSLEYFP</i>            | AAAGTCGCTCTGAGTTGTTAT       | GCGAAGAGTTTGTCTCAACC        | 300 ( <i>Rosa</i><br><i>locus</i><br>floxed/del) |
|                                 | AAAGTCGCTCTGAGTTGTTAT       | GGAGCGGGAGAAATGGATATG       | 600 (wt<br><i>Rosa</i><br><i>locus</i> )         |
| <i>Foxn1:s-Fgfr2b</i>           | AAAGTCGCTCTGAGTTGTTAT       | CAGACTTCTTCCCTGAAGAC        | 300                                              |
| <i>pLck:Cre</i>                 | TGCATGATCTCCGGTATTGA        | CGTACTGACGGTGGGAGAAT        |                                                  |
| <i>Rosa26LSLCas9EYFP</i>        | AAAGTCGCTCTGAGTTGTTAT       | GGAGCGGGAGAAATGGATATG       | 600 (wt<br><i>Rosa</i><br><i>locus</i> )         |
|                                 | CCACGACGGAGACTACAAGG        | GGGCTCCGATCAGGTTCTTC        | 254<br>( <i>Cas9</i> )                           |

**Supplementary Table 16** | Antibodies and staining reagents used in this study.

| <b>Antigen/Reagent</b> | <b>Clone</b>         | <b>Conjugate</b>   | <b>Supplier</b>                | <b>Catalogue Number</b>  | <b>dilution</b> |
|------------------------|----------------------|--------------------|--------------------------------|--------------------------|-----------------|
| CD4                    | GK1.5                | FITC               | BioLegend                      | 100406                   | 1:1000          |
| CD8a                   | 53-6.7               | FITC<br>APC        | eBioscience                    | 11-0081-82<br>17-0081-82 | 1:200<br>1:1000 |
| CD31                   | MEC13.3              | FITC               | BioLegend                      | 102506                   | 1:300           |
| CD45                   | 30-F11               | PE Cy7             | BioLegend                      | 103114                   | 1:2000          |
| EpCAM                  | G8.8                 | APC                | BioLegend                      | 118214                   | 1:1000          |
| Keratin 5              | rabbit<br>polyclonal | -                  | Covance                        | PRB-160P                 | 1:500           |
| Keratin 8              | Troma-1              | -                  | produced in house              | -                        | 1:200           |
| Ly51                   | 6C3                  | PE                 | eBioscience                    | 12-5891-83               | 1:300           |
| Streptavidin           | -                    | Cy3                | Jackson<br>ImmunoResearch      | 016-160-084              | 1:1000          |
| Streptavidin           | -                    | eFluor450          | eBioscience                    | 48-4317-82               | 1:1000          |
| UEA-1                  | -                    | FITC               | Vector<br>Laboratories         | FL-1061-5                | 1:1000          |
| Keratin 18             | Ks18.04              | biotin             | PROGEN                         | 61528                    | 1:10            |
| mCardinal (RFP)        | rabbit<br>polyclonal | -                  | ThermoFisher<br>Scientific     | R10367                   | 1:500           |
| MHC2                   | M5/114.15.2          | FITC               | BioLegend                      | 107606                   | 1:4000          |
| rabbit IgG (H+L)       | goat<br>polyclonal   | Alexa Fluor<br>633 | Invitrogen<br>Molecular Probes | A-21070                  | 1:500           |
| rat IgG (H+L)          | donkey<br>polyclonal | Cy3                | Jackson<br>ImmunoResearch      | 712-166-153              | 1:500           |
